# Supplementary material for: ERα upregulates Phd3 to ameliorate HIF-1 induced fibrosis and inflammation in adipose tissue
Source: PubMed Central journal article supplement — Mol Metab. 2014 Jun 7;3(6):642–51. doi: 10.1016/j.molmet.2014.05.007 (PMC4142394; doi:10.1016/j.molmet.2014.05.007), 2014-06-07
Supplement: mmc1.pdf [file mmc1.pdf]

**ER $\alpha$  upregulates PHD3 to ameliorate HIF-1 induced fibrosis and inflammation in adipose tissue.**

Min Kim<sup>\*</sup>, Michael D. Neinast<sup>\*</sup>, Aaron P. Frank<sup>\*</sup>, Kai Sun, Jiyoung Park, Jordan A. Zehr, Lavanya Vishvanath, Eugenia Morselli, Mason Amelotte, Biff Palmer, Rana K. Gupta, Philipp E. Scherer, and Deborah J. Clegg<sup>\*</sup>

**Supplementary Figures 1 to 4 and Tables 1 to 2:**

a

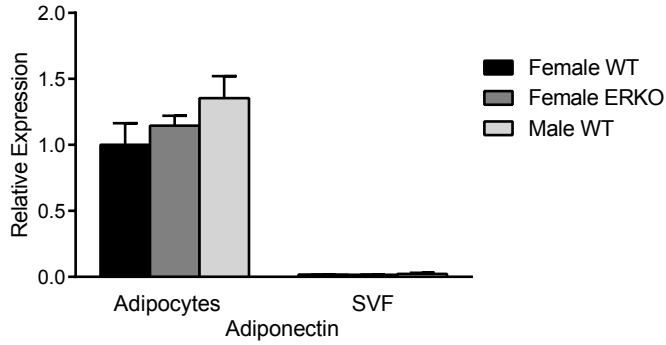

**Supplementary Figure 1.** Isolation of adipocytes and stromal vascular fraction.

(a) qPCR quantification of Adiponectin mRNA from adipocyte and stromal-vascular fractions of inguinal AT (experiment in Figure 1e demonstrates effective separation of adipocytes from stromal vascular cells). Data presented as mean  $\pm$  SEM. All SVF values significantly different ( $P < 0.05$ ) as determined by two-tailed Student's t test relative to female WT adipocytes.

**a**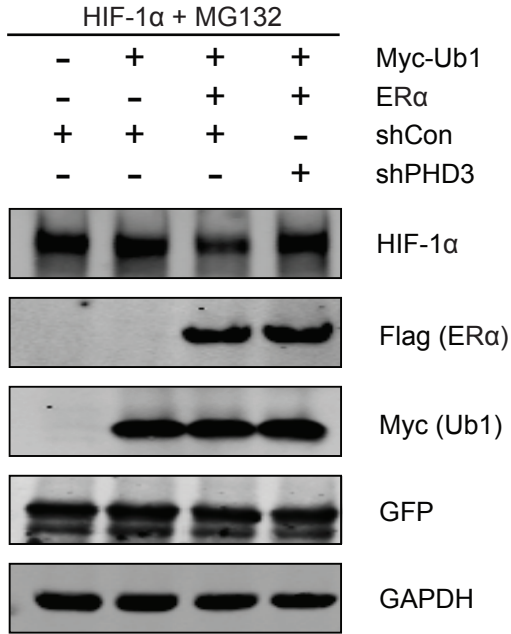**b**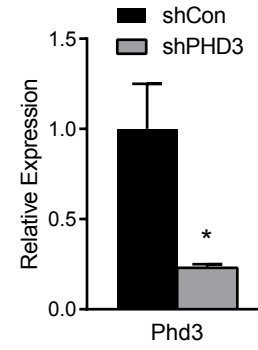

**Supplementary Figure 2.** ER $\alpha$  increases ubiquitination of HIF-1 $\alpha$  in a PHD3-dependent manner.

**(a)** Additional western blots from experiment in Figure 2d: HIF-1 $\alpha$ , exogenous ER $\alpha$  detected by FLAG tag, exogenous Ubiquitin detected by Myc, exogenous GFP, and the loading control GAPDH. **(b)** qPCR quantification of PHD3 mRNA from figure 2d. Data presented as mean  $\pm$  SEM. \*  $P < 0.05$  by two-tailed Student's  $t$  test between shCon and shPHD3. Data are representative of results from 3 independent experiments.

**a**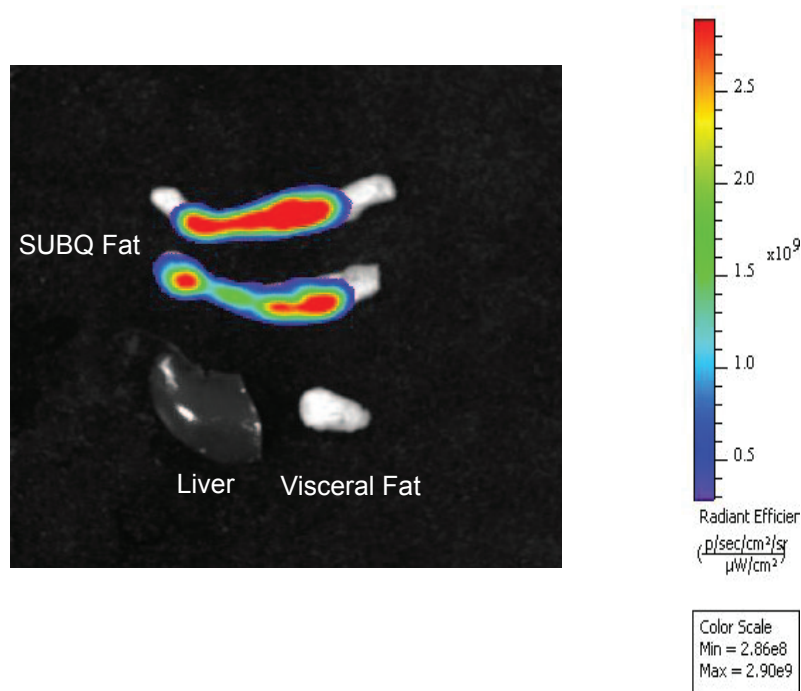**b**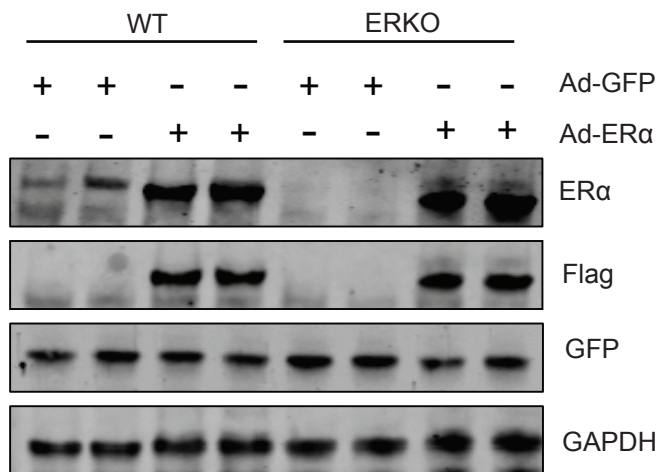**c**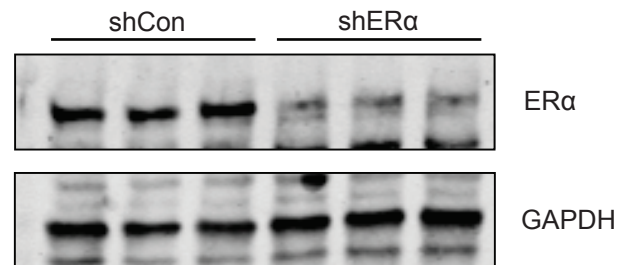

### Supplementary Figure 3. Validation of adenoviral overexpression vector injections.

- (a) Representative images of injected mice from experiments in Figures 3-6 showing fluorescence produced by exogenous GFP specifically in fat pads but not in the liver or visceral fat. (b) Additional representative western blots from experiment in Figure 3: ERα, exogenous ERα detected by FLAG tag, exogenous GFP, and the loading control GAPDH. (c) Additional representative western blot from experiment in Figure 4 with ERα and GAPDH.

**a**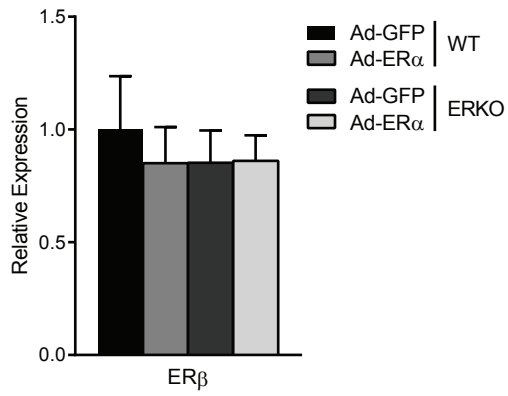**b**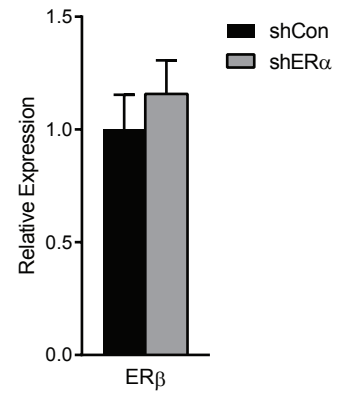**c**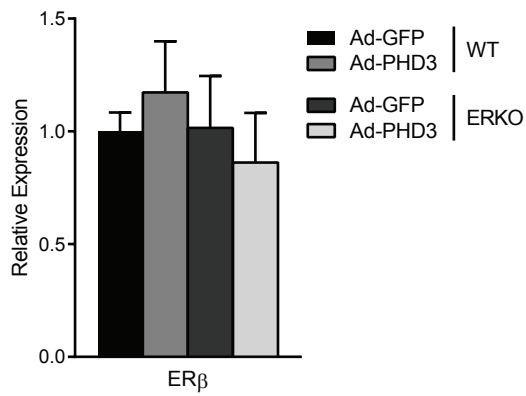**d**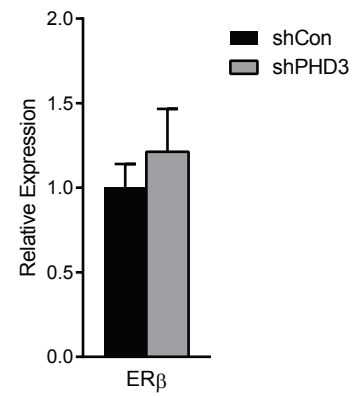

### Supplementary Figure 4. ERβ expression in adenoviral injection experiments

qPCR quantification of ERβ in inguinal AT from experiments in Figure 3 (a) Figure 4 (b) Figure 5 (c) and Figure 6 (d). Data presented as mean ± SEM.

**Supplementary Table 1.** Candidate Estrogen Response Elements (ERE) in promoter of PHD3 and primers used in PCR of ChIP assay.

| Candidate ERE | Location       | Sequence        | Forward (5' – 3')     | Reverse (5' – 3')      |
|---------------|----------------|-----------------|-----------------------|------------------------|
| -2038         | -2038 to -2024 | TGTCCCTGCAGATCA | caatctccaaagctgcaaagc | cttcccactgttatctgagccc |
| -1832         | -1832 to -1818 | TGGCCGCTGAGGTCT | ggatgggacaggacagctgt  | acctttgcaagcagtactgagg |
| -1005         | -1005 to -0991 | AAGCCAGAGAGACCT | cttttggtagggcctaggg   | tctgcgggagatgttcat     |
| -599          | -0599 to -0585 | TCACCAGAGAGGTGA | gccagacccgaatcaaacag  | cacgtctgagatgcacatgaac |

**Supplementary Table 2.** Primers used for RT-qPCR.

| Assay         | Forward (5' – 3') or TaqMan ID | Reverse (5' – 3')        |
|---------------|--------------------------------|--------------------------|
| mPHD1         | tgcttggtagaaggtcacg            | gcgccattgatgacgtagt      |
| mPHD2         | tctggtctgaccggcgtaac           | agctctcgctcgctcatctgt    |
| mPHD3-endo    | tgaagaaagggcagaagcca           | ttactacgaatgcgggccat     |
| mPHD3-total   | ttgggacgccaagttacacg           | tggcataggagggtggactt     |
| mCol1a1       | gtgctcctggtattgctggt           | ggctcctcgtttctcttctt     |
| mCol3a1       | gggtttccctggtcctaaag           | cctggttcccattttctcc      |
| mCol6a1       | gatgagggtgaagtgggaga           | cagcacgaagaggatgtcaa     |
| mLOX          | ccacagcatggacgaattca           | agcttgctttgtgccttca      |
| mGAPDH        | aggtcggtgtaacggattg            | tgtagaccatgtagttgaggatca |
| mHPRT         | aagcctaagatgagcgcaag           | Ttactaggcagatggccaca     |
| mER $\beta$   | ctgttactagtccaagcgcca          | cccagatgcataatcactgca    |
| mB2M          | Mm00437762_m1                  |                          |
| hER $\alpha$  | Hs00174860_m1                  |                          |
| mER $\alpha$  | Mm00433148_m1                  |                          |
| mTNF $\alpha$ | Mm00443260_m1                  |                          |
| mIL6          | Mm00446190_m1                  |                          |
| mIL1b         | Mm00434228_m1                  |                          |
| mTLR4         | Mm00445273_m1                  |                          |
